# Supplementary material for: Integrating GWAS, linkage mapping and gene expression analyses reveals the genetic control of growth period traits in rapeseed (Brassica napus L.)
Source: PubMed Central journal article supplement (PMC7397576; doi:10.1186/s13068-020-01774-0), 2020-08-03

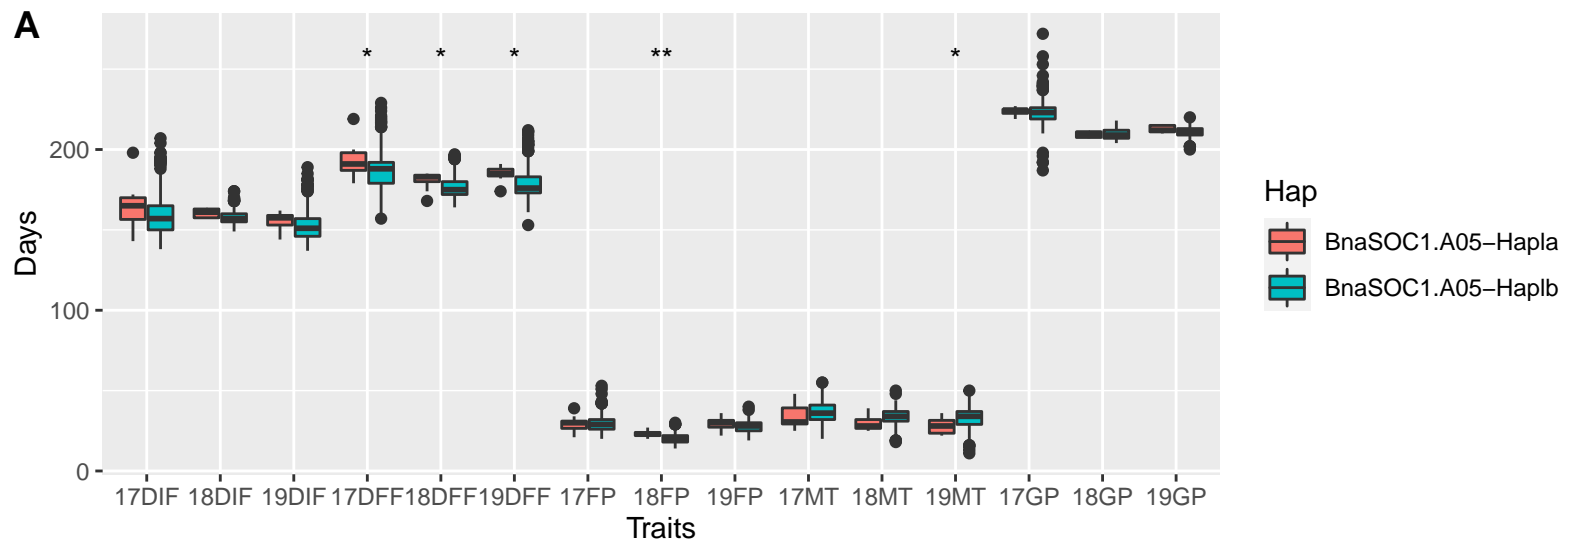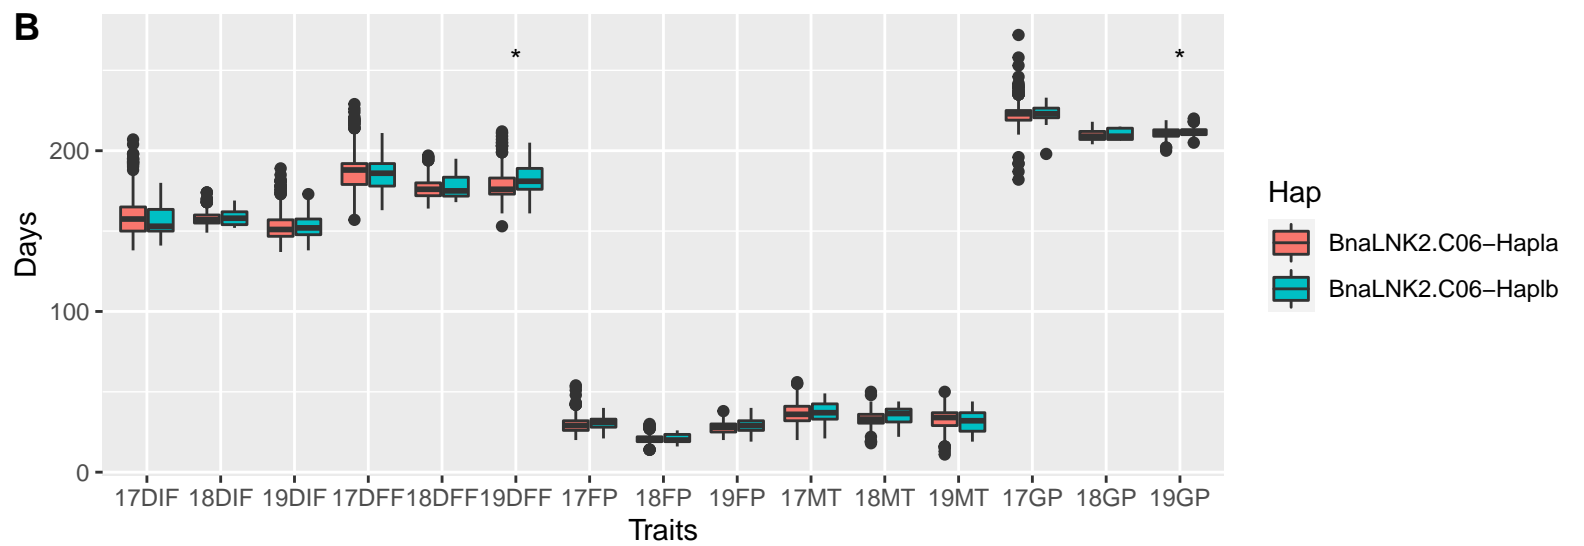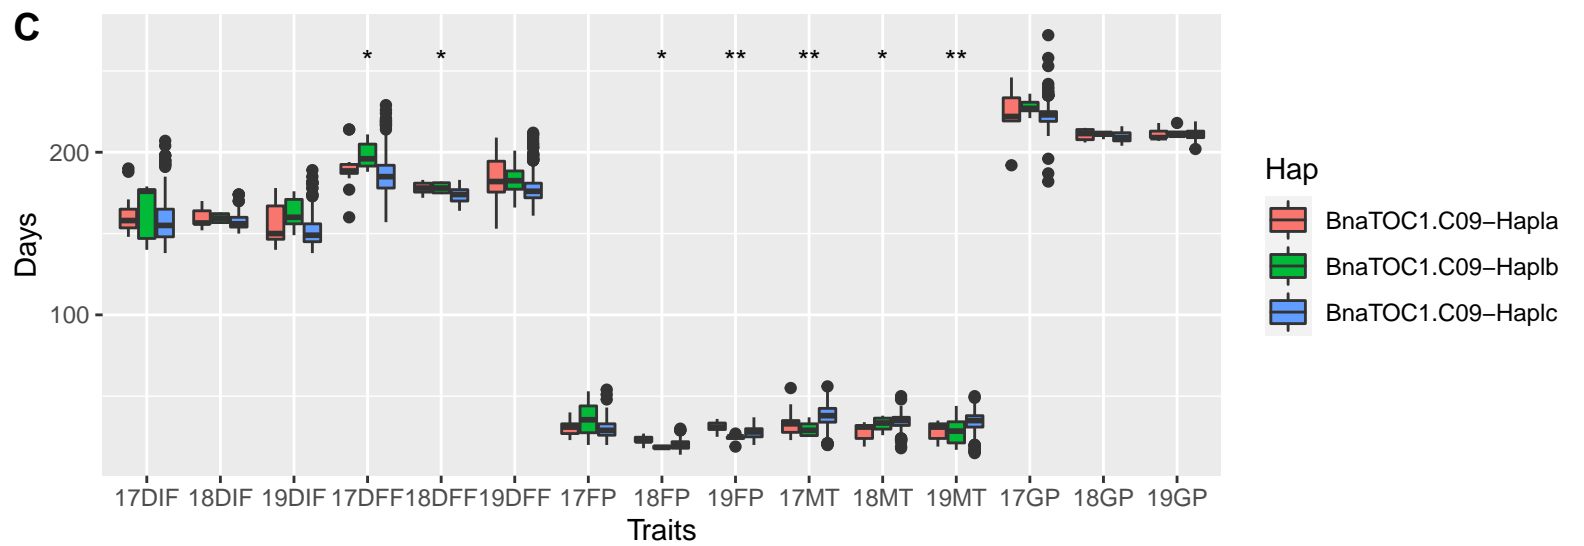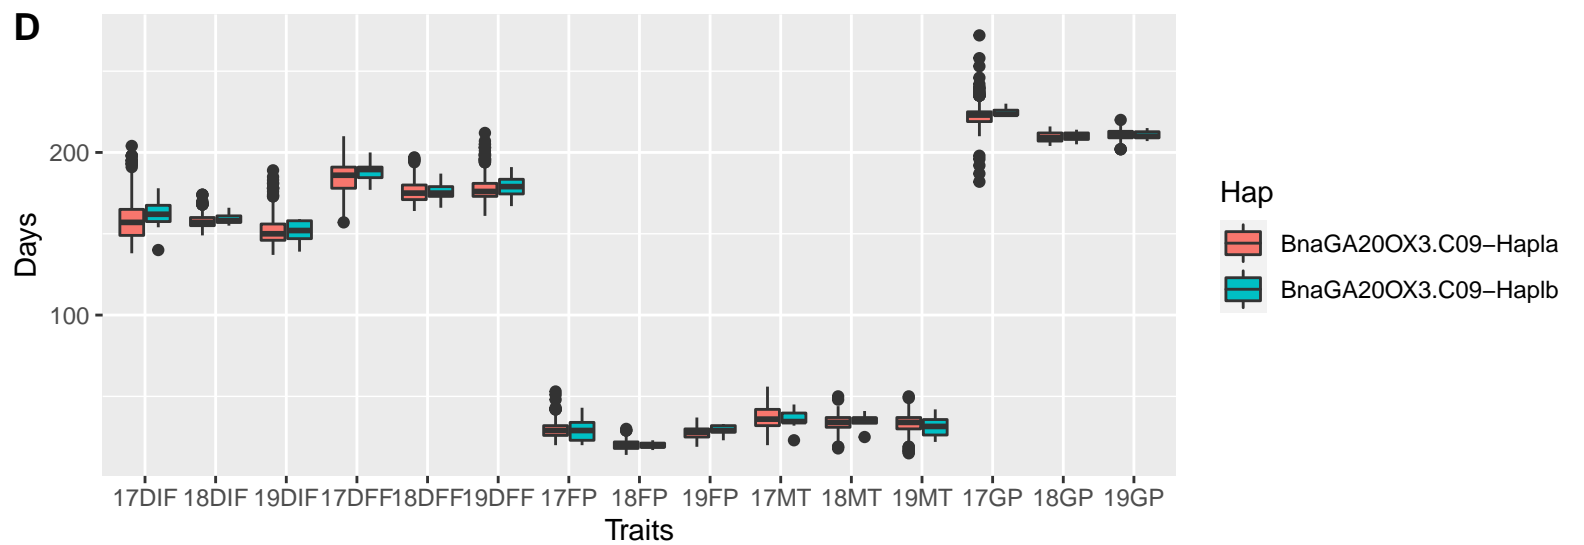

Supplement: 13068_2020_1774_MOESM22_ESM.pdf [file 13068_2020_1774_MOESM22_ESM.pdf]
